# Supplementary material for: Transcriptome Mechanisms of Tomato Seedlings Induced by Low-Red to Far-Red Light Ratio under Calcium Nitrate Stress
Source: MDPI journal article supplement (doi:10.3390/ijms24043738), 2023-02-13
Supplement: s1 [file s1]

## Supplemental information

**Supplementary Table S1**

**Primer sequences used for quantitative Real-Time PCR**

| Gene name             | Primer  | Primer sequences (5'-3')   |
|-----------------------|---------|----------------------------|
| <i>Solyc01g102300</i> | Forward | GGGATGGGATTTGGGTTGGGTATG   |
|                       | Reverse | GATAAGCGGTGGAAGCAGGAATAGG  |
| <i>Solyc08g076970</i> | Forward | GGGAAC TTGTGGTAACTGGAAAGGG |
|                       | Reverse | AGCGGGTTTGAATTTCTTTGAGTGC  |
| <i>Solyc11g069430</i> | Forward | GGTGGTGTTAATGTCATGGCAGGAG  |
|                       | Reverse | TTAGGGTCGGTGGCGGAGAAG      |
| <i>Solyc11g007690</i> | Forward | TGCCTTGAATCGGGAATGTCTGTG   |
|                       | Reverse | TAGTTCAGGACCACCAGTGTCTAGC  |
| <i>Solyc06g071000</i> | Forward | GGTCCTGTCCTTACGGTTACAAC TG |
|                       | Reverse | AGGCTTCACCACCAAAGAGCAATC   |
| <i>Solyc02g093720</i> | Forward | ATGTAGAGGAGGCTGAGAGGTATGC  |
|                       | Reverse | CGGGGTTTTGTTGATTGGCTTG TTC |
| <i>Solyc10g081840</i> | Forward | CTTACTTAAACCGCGCAAGCCATTC  |
|                       | Reverse | CCATCCGTCTTCCTCGTGTTC AAG  |
| <i>Solyc08g044260</i> | Forward | TGGCTTCAA AACCAGGGATTCTCAC |
|                       | Reverse | TCCCACAAATGGTGCCAAAACAATG  |
| <i>Solyc02g083130</i> | Forward | CTCAAGCCACCAGAAGAGCGTATAG  |
|                       | Reverse | GGCAACTTCCGATTCTCCGTCATC   |
| <i>actin</i>          | Forward | TGGTCGGAATGGGACAGAAG       |
|                       | Reverse | CTCAGTCAGGAGAACAGGGT       |

**Supplementary Table S2****The hub genes in the pink module, saddlebrown module and darkgrey module**

| <b>Gene name</b>          | <b>Description</b>                                              | <b>Degree</b> |
|---------------------------|-----------------------------------------------------------------|---------------|
| <b>Pink module</b>        |                                                                 |               |
| Solyc08g080010.2          | Subtilisin-like protease                                        | 20            |
| Solyc11g005340.2          | Plastid-lipid associated protein PAP / fibrillin family protein | 17            |
| Solyc05g009930.3          | Hydroxyproline-rich glycoprotein family protein                 | 16            |
| Solyc12g008830.2          | GATA-like transcription factor                                  | 14            |
| Solyc07g039195.1          | Dystrophin-1                                                    | 10            |
| Solyc08g078780.2          | LOW QUALITY:Plant/MNJ7-17 protein, putative                     | 10            |
| <b>Saddlebrown module</b> |                                                                 |               |
| Solyc05g050220.3          | TAF-3                                                           | 19            |
| Solyc01g098490.3          | Sugar facilitator protein 1                                     | 17            |
| Solyc10g008040.3          | Late embryogenesis abundant protein-like                        | 15            |
| Solyc06g005460.1          | LOW QUALITY:Pectinesterase inhibitor                            | 13            |
| Solyc01g080410.3          | Methionine sulfoxide reductase, putative                        | 12            |
| Solyc11g006290.2          | 3-oxo-5- $\alpha$ -steroid 4-dehydrogenase family protein       | 12            |
| Solyc06g068130.3          | Tetratricopeptide repeat (TPR)-like superfamily protein         | 12            |
| Solyc03g097510.1          | Small auxin up-regulated RNA38                                  | 11            |
| Solyc03g005840.2          | Outward rectifying potassium channel protein                    | 11            |
| Solyc07g054060.3          | Phospho-N-acetylmuramoyl-pentapeptide-transferase, putative     | 10            |
| <b>Darkgrey module</b>    |                                                                 |               |
| Solyc06g083390.3          | RPM1-interacting protein 4                                      | 45            |
| Solyc02g071110.3          | Purine permease                                                 | 31            |
| Solyc11g013130.2          | Cysteine-rich/transmembrane domain protein A                    | 28            |
| Solyc06g066170.3          | Isoflavone reductase homolog                                    | 19            |
| Solyc02g081610.2          | Phosphatidylinositol N-acetylglucosaminyltransferase            | 19            |
| Solyc06g063140.3          | 26S protease regulatory subunit, putative                       | 18            |
| Solyc10g084770.2          | Protein kinase                                                  | 17            |
| Solyc03g119930.1          | Sulfate transporter, putative                                   | 16            |
| Solyc03g115230.3          | Solanum lycopersicum heat shock protein                         | 16            |
| Solyc11g009000.2          | Alpha/beta-Hydrolases superfamily protein                       | 12            |
| Solyc12g036650.2          | translocase subunit seca                                        | 11            |

Supplementary Table S3

## Amino acid sequence information on sulfate transporters

| Species                     | Proposed SULTRs protein | Locus tag               |
|-----------------------------|-------------------------|-------------------------|
| <i>Solanum lycopersicum</i> | SULTR                   | Solyc03g119930.1        |
| <i>Arabidopsis thaliana</i> | AtSULTR3;1              | AT3G51895               |
| <i>Arabidopsis thaliana</i> | AtSULTR3;2              | AT4G02700               |
| <i>Arabidopsis thaliana</i> | AtSULTR3;3              | AT1G23090               |
| <i>Arabidopsis thaliana</i> | AtSULTR3;4              | AT3G15990               |
| <i>Arabidopsis thaliana</i> | AtSULTR3;5              | AT5G19600               |
| <i>Arabidopsis thaliana</i> | AtSULTR4;1              | AT5G13550               |
| <i>Arabidopsis thaliana</i> | AtSULTR4;2              | AT3G12520               |
| <i>Zea mays</i>             | ZmSULTR2;1              | ZEAMMB73_Zm00001d028164 |
| <i>Zea mays</i>             | ZmSULTR3;3              | ZEAMMB73_Zm00001d002038 |
| <i>Zea mays</i>             | ZmSULTR3;4              | ZEAMMB73_Zm00001d000204 |
| <i>Zea mays</i>             | ZmSULTR3;5              | ZEAMMB73_Zm00001d043614 |
| <i>Oryza sativa</i>         | OsSULTR1;1              | AF493790                |
| <i>Oryza sativa</i>         | OsSULTR1;2              | ABF94450                |
| <i>Oryza sativa</i>         | OsSULTR1;3              | AF493790                |
| <i>Oryza sativa</i>         | OsSULTR2;1              | AAN59769                |
| <i>Oryza sativa</i>         | OsSULTR2;2              | AAN59770                |
| <i>Oryza sativa</i>         | OSSULTR3;1              | NP_921514               |
| <i>Oryza sativa</i>         | OsSULTR3;2              | AAN06871                |
| <i>Oryza sativa</i>         | OsSULTR3;3              | AK104831                |
| <i>Oryza sativa</i>         | OsSULTR3;4              | BAD68396                |
| <i>Oryza sativa</i>         | OsSULTR4;1              | AF493793                |
