# Supplementary material for: Transcriptome Mechanisms of Tomato Seedlings Induced by Low-Red to Far-Red Light Ratio under Calcium Nitrate Stress
Source: Int J Mol Sci. 2023 Feb 13;24(4):3738. doi: 10.3390/ijms24043738 (PMC9963801; doi:10.3390/ijms24043738)
Supplement: Supplementary file 1 [file ijms-24-03738-s001.zip]

Archive with 10 entries (10 files):
- Figure Captions.pdf
- FigureS1.pdf
- FigureS2A.pdf
- FigureS2B.pdf
- FigureS2C.pdf
- FigureS2D.pdf
- FigureS3.pdf
- FigureS4.pdf
- FigureS5.pdf
- Tables S1-S3.pdf
