# Supplementary figures and images for: Transcriptome Mechanisms of Tomato Seedlings Induced by Low-Red to Far-Red Light Ratio under Calcium Nitrate Stress
Source: MDPI journal article supplement (doi:10.3390/ijms24043738), 2023-02-13

**A**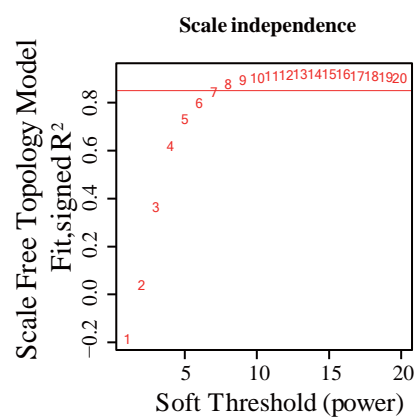**B**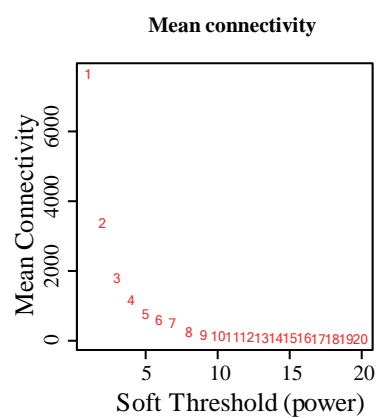

Supplement: s1 [file s1]

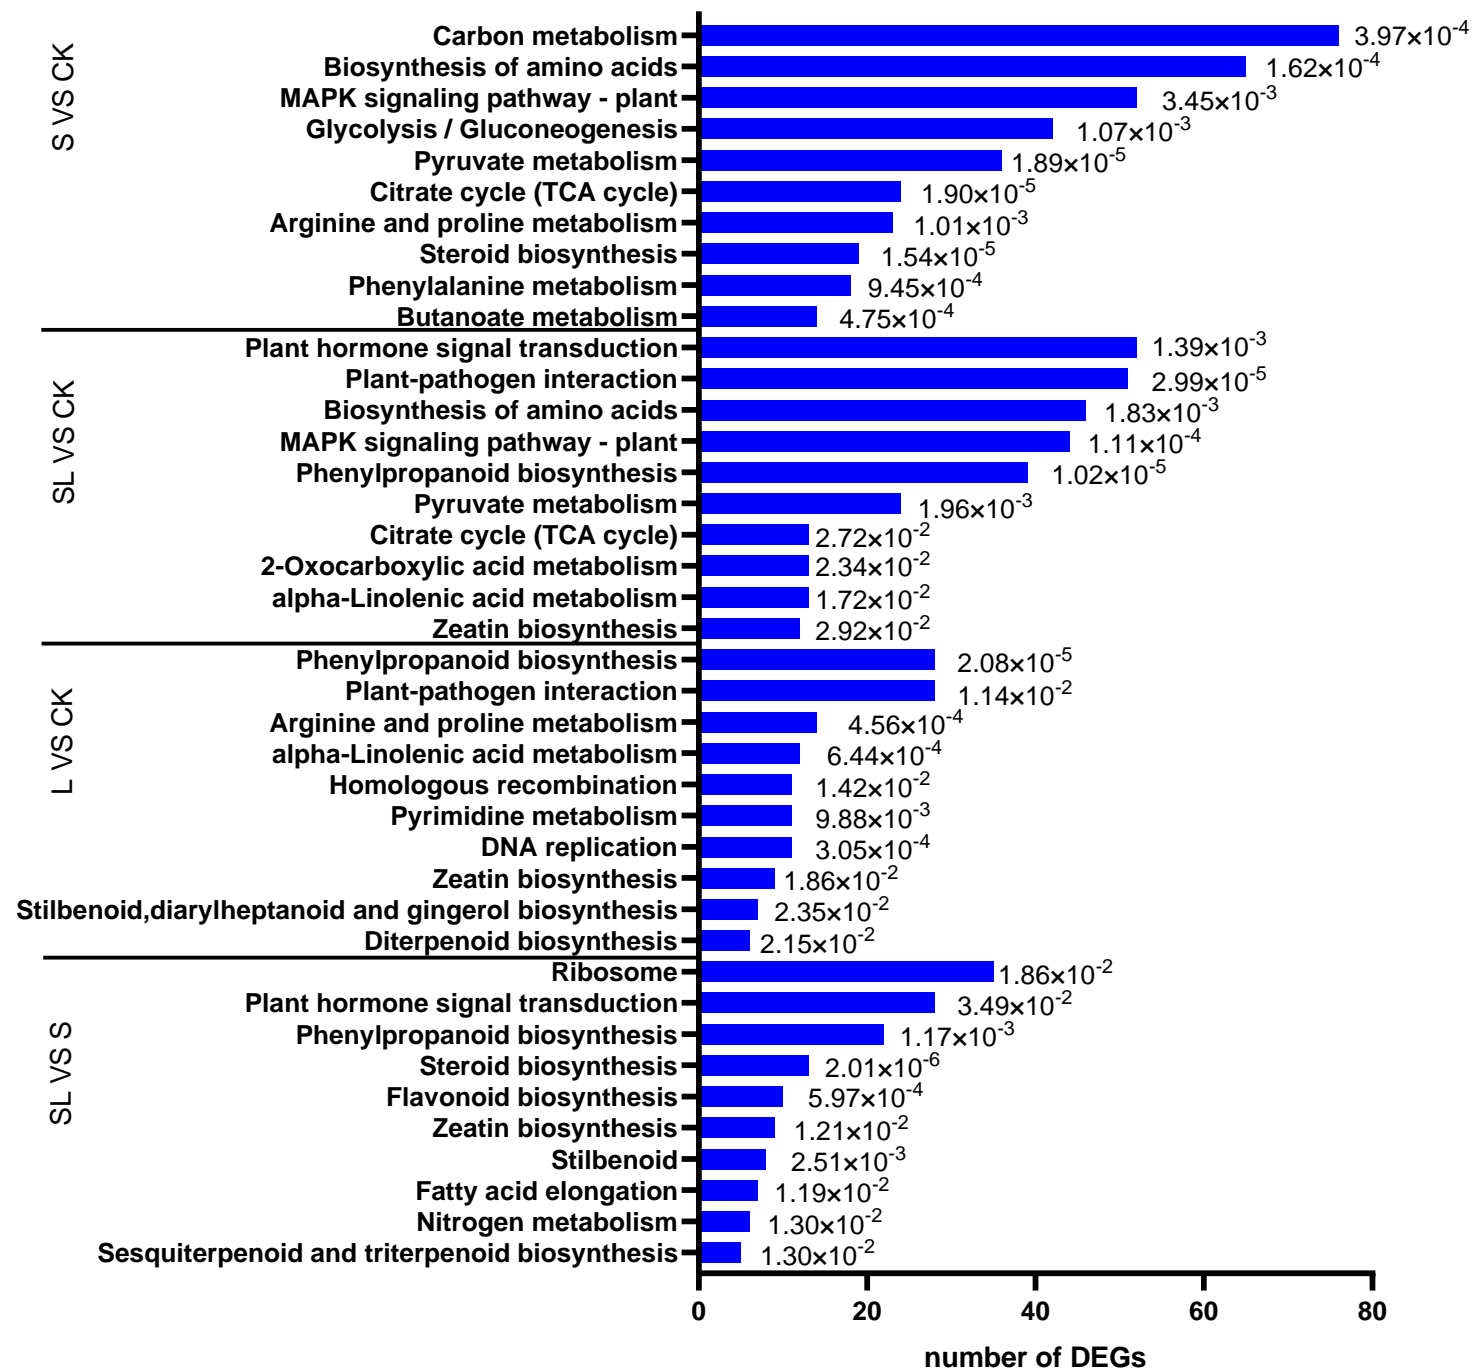

Supplement: s1 [file s1]

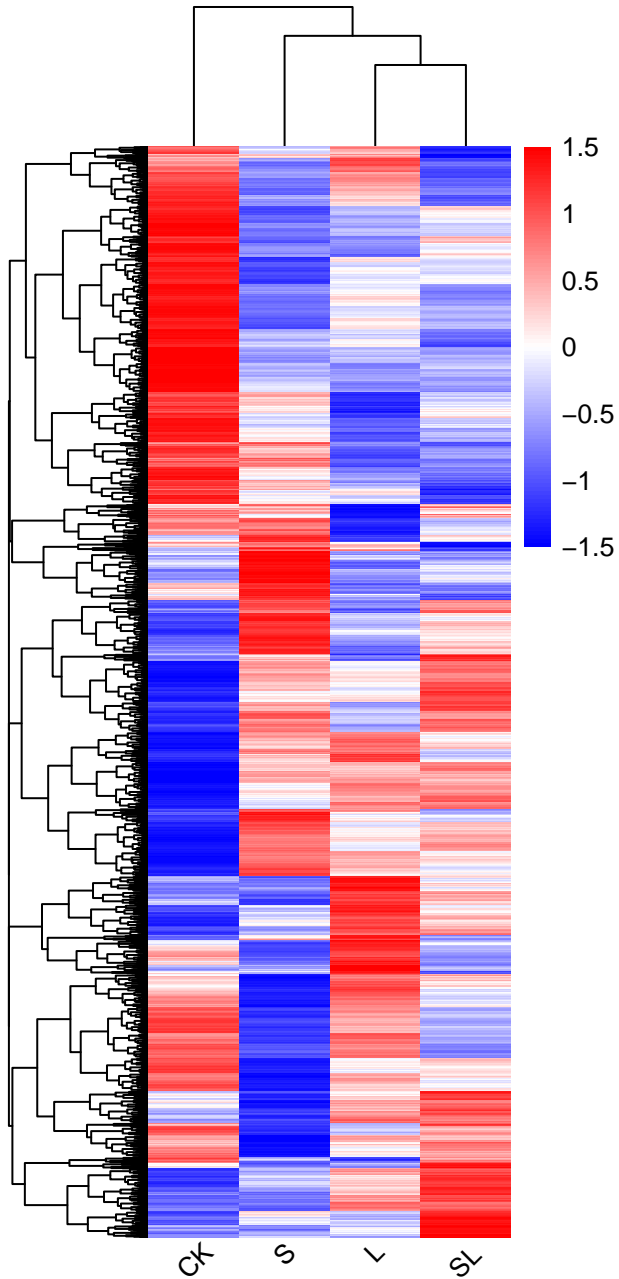

Supplement: s1 [file s1]

Description

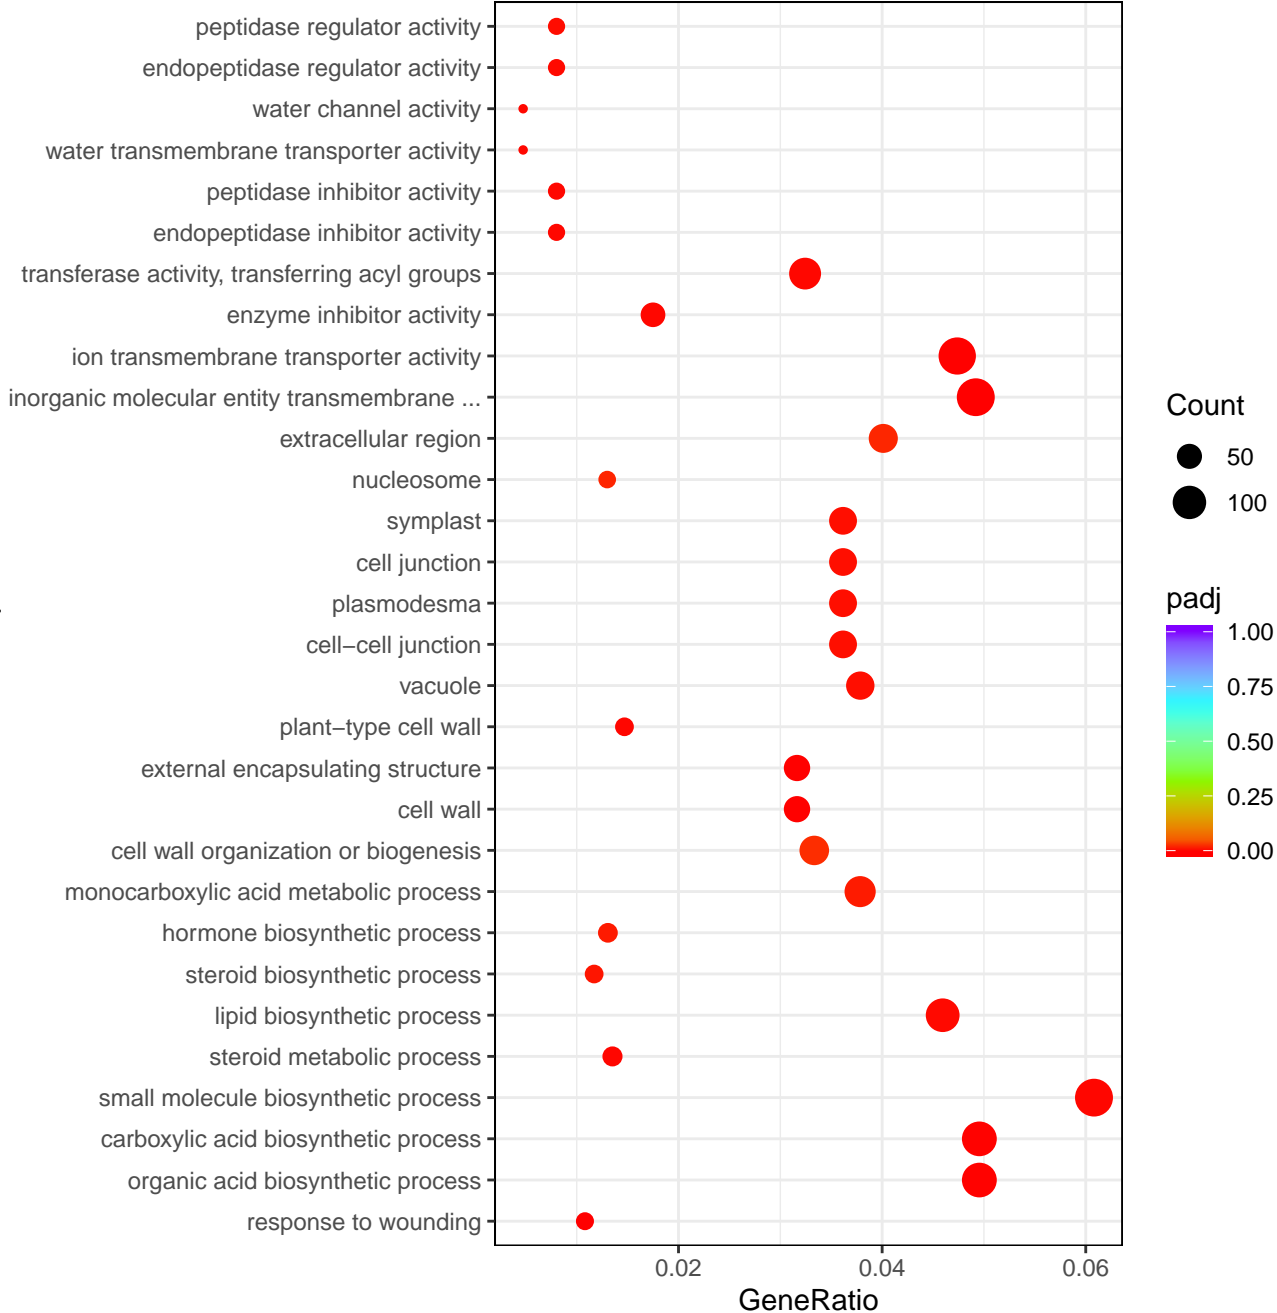

Supplement: s1 [file s1]

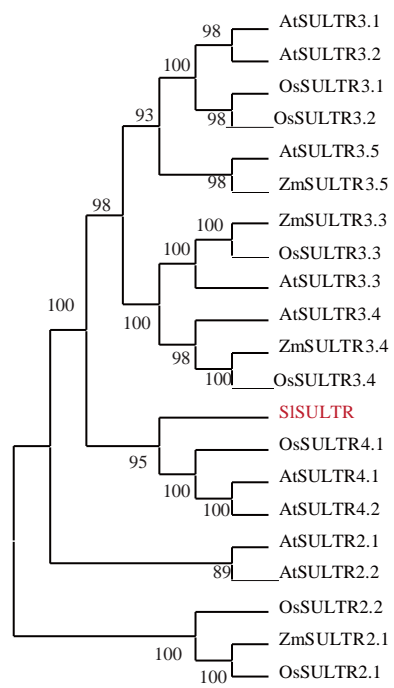

Supplement: s1 [file s1]

Description

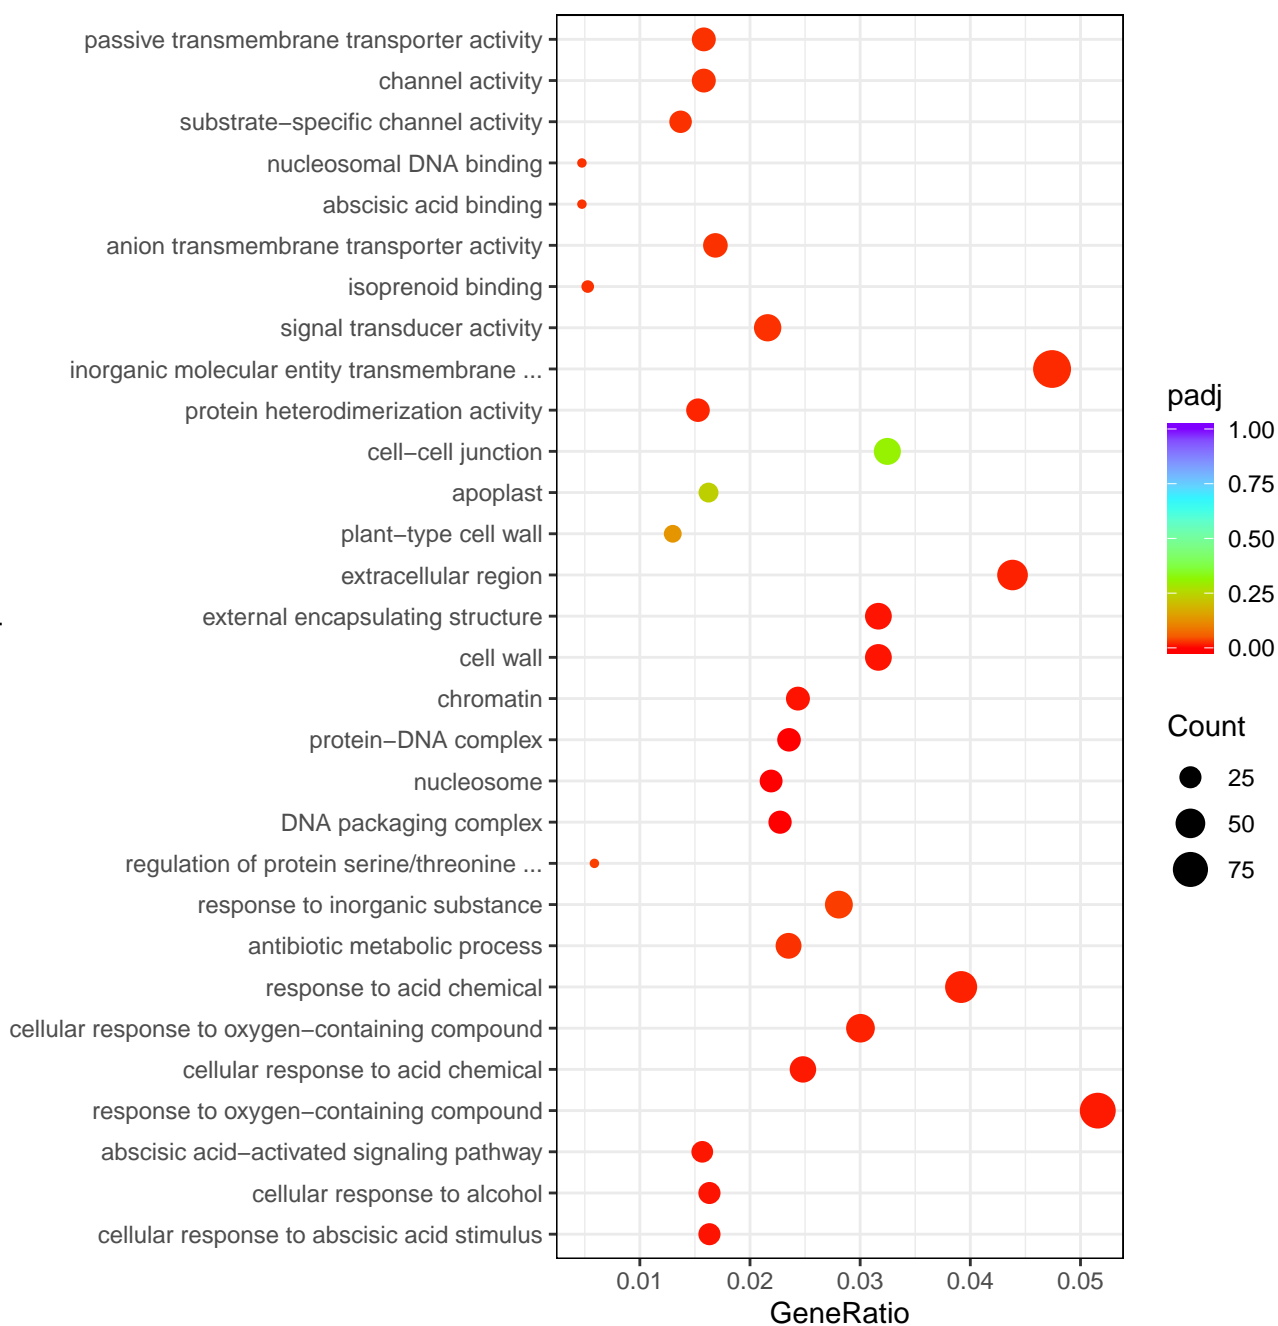

Supplement: s1 [file s1]

Description

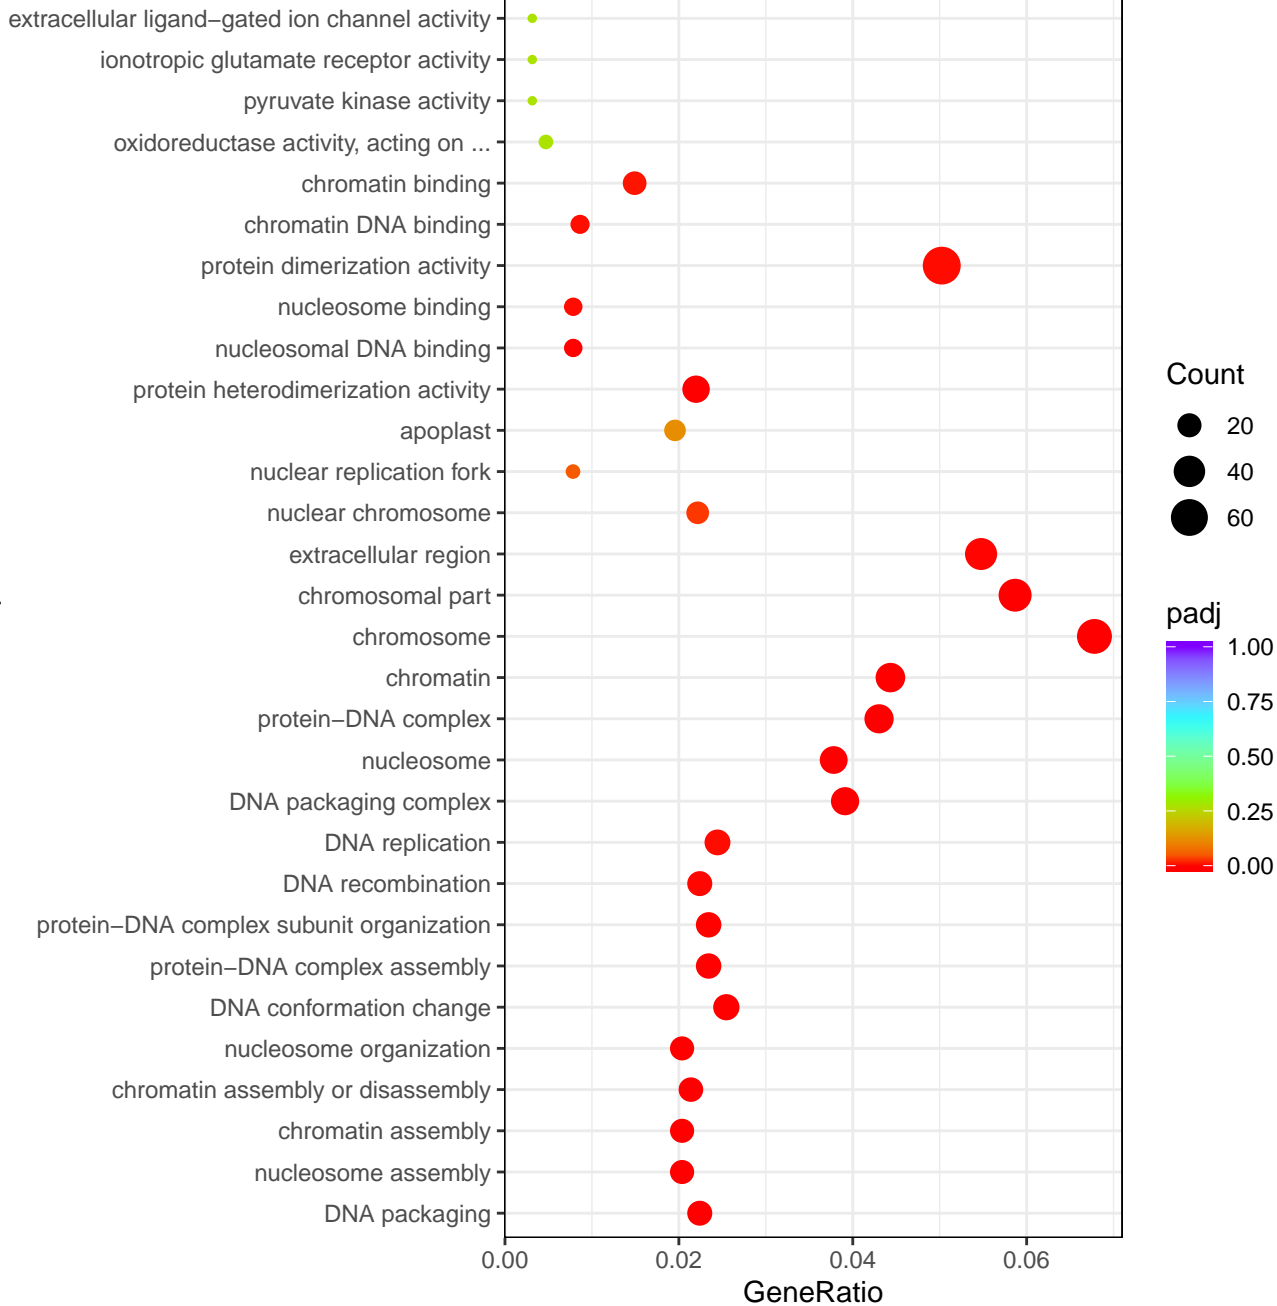

Supplement: s1 [file s1]

Description

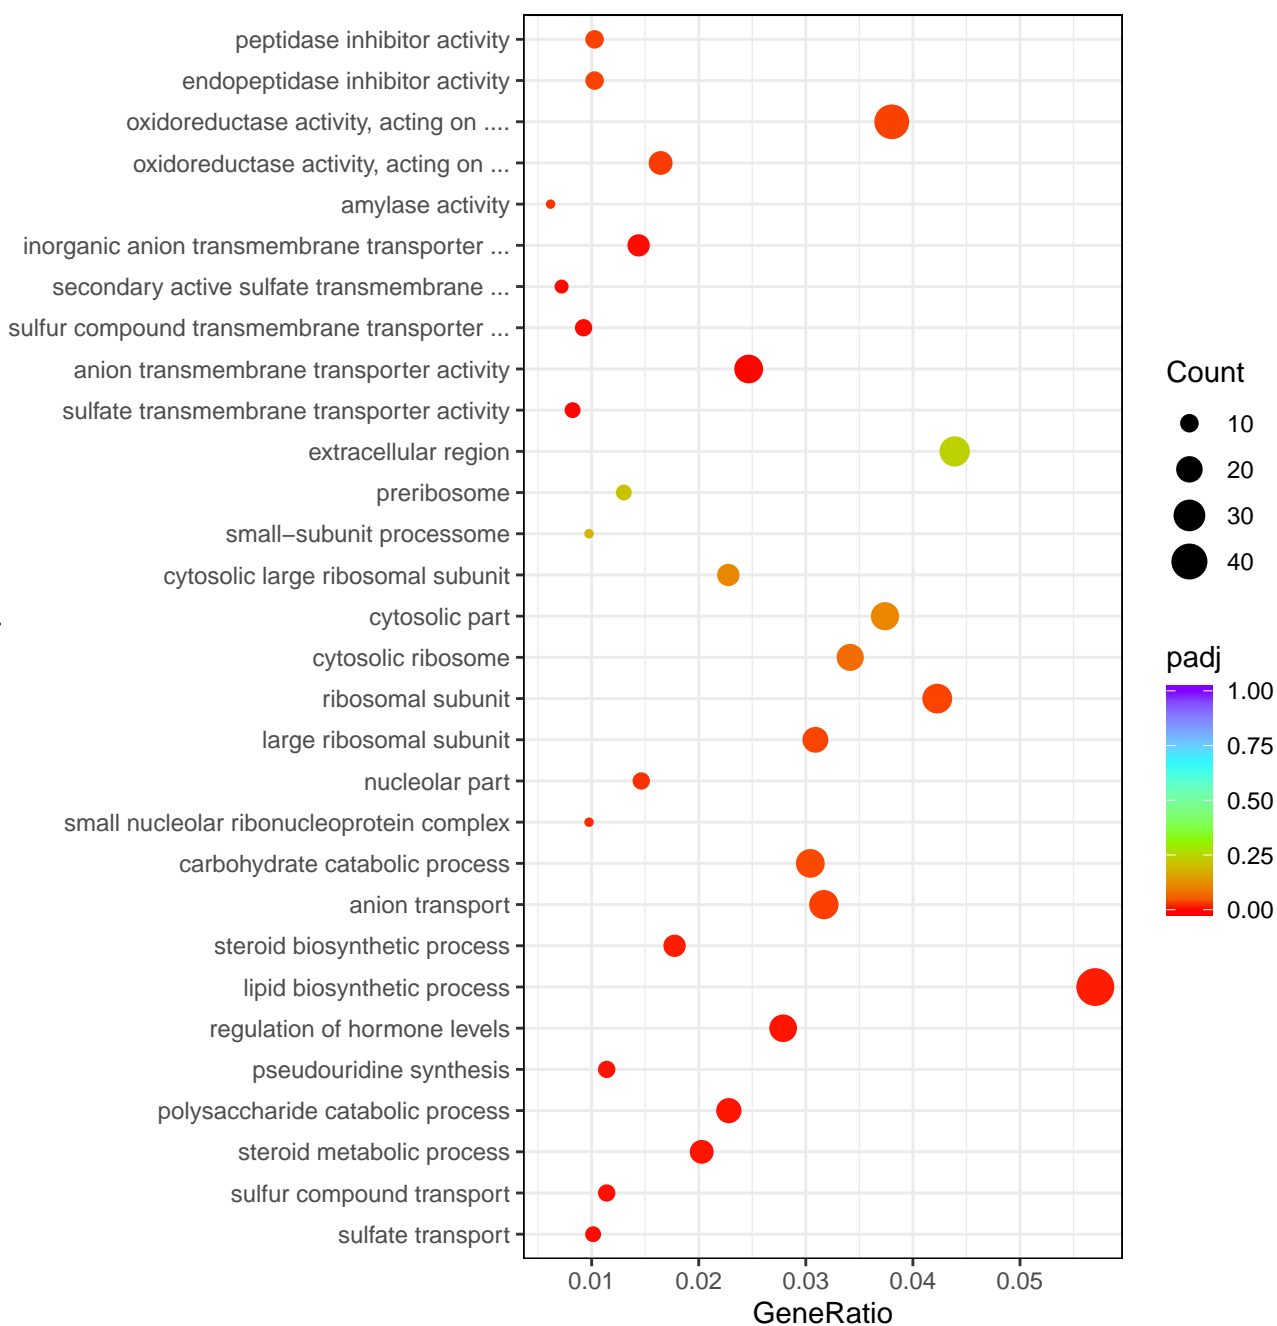

Supplement: s1 [file s1]
